# Supplementary material
Source: Springer Nature journal article supplement (https://www.springermedizin.de/resource/supplementary/13098_2009_30_MOESM2_ESM.pdf/9670376)

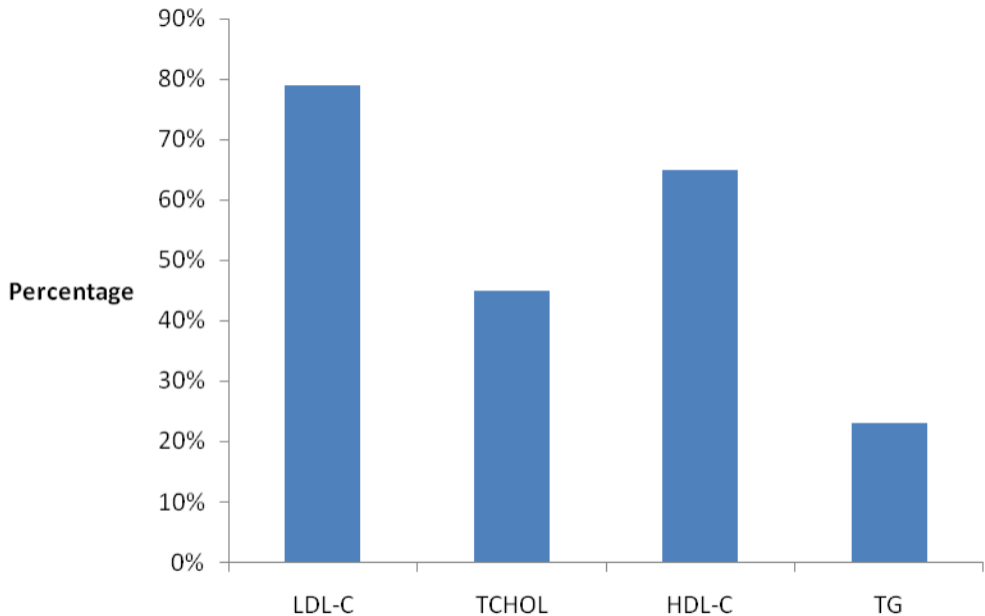

Supplement: MOESM2 [file 9670376]
